# Supplementary material for: Using formalin fixed paraffin embedded tissue to characterize the preterm gut microbiota in necrotising enterocolitis and spontaneous isolated perforation using marginal and diseased tissue
Source: PubMed Central journal article supplement (PMC6398254; doi:10.1186/s12866-019-1426-6), 2019-03-04

**A**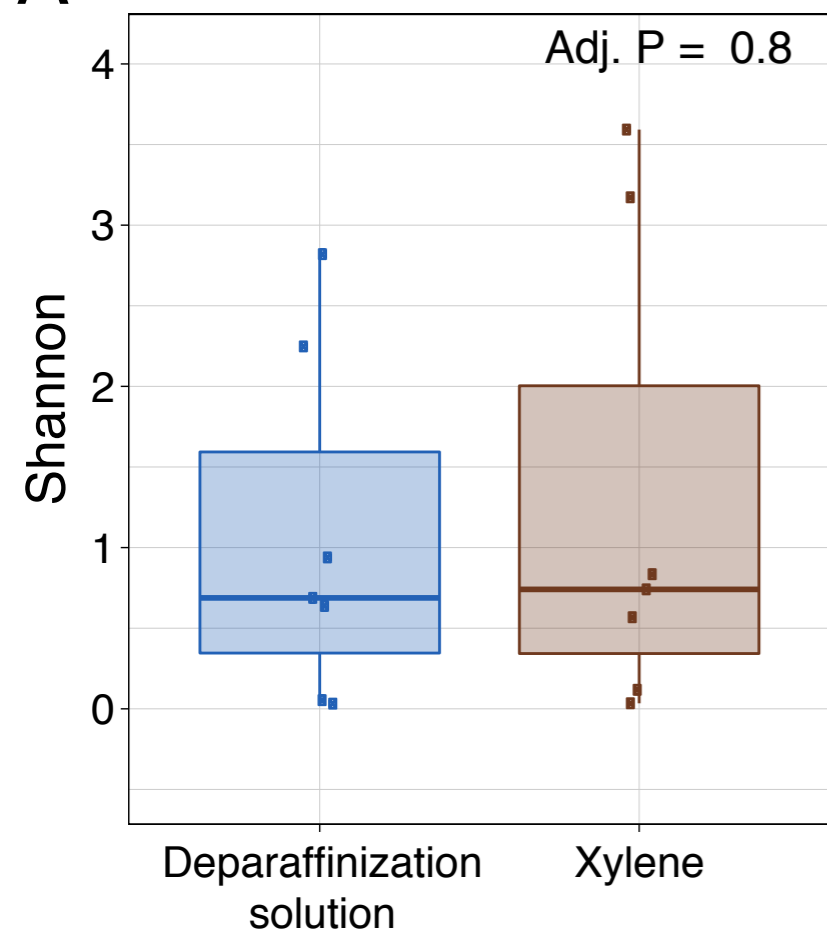**B**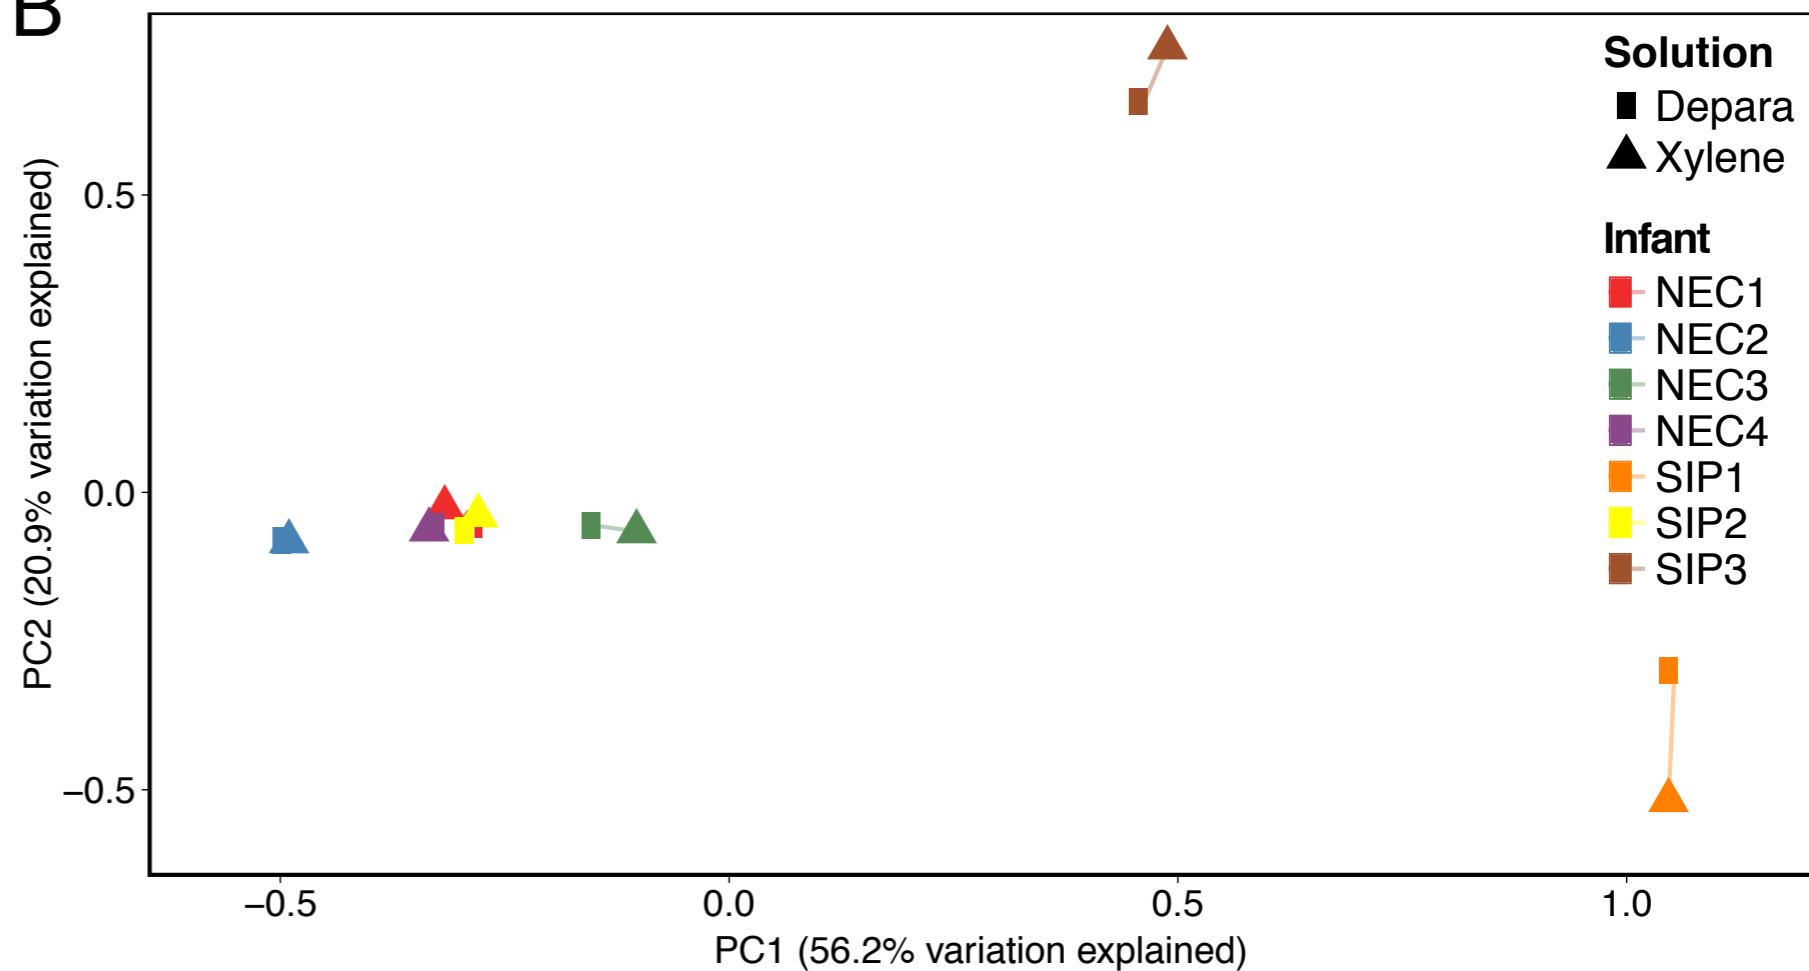**C**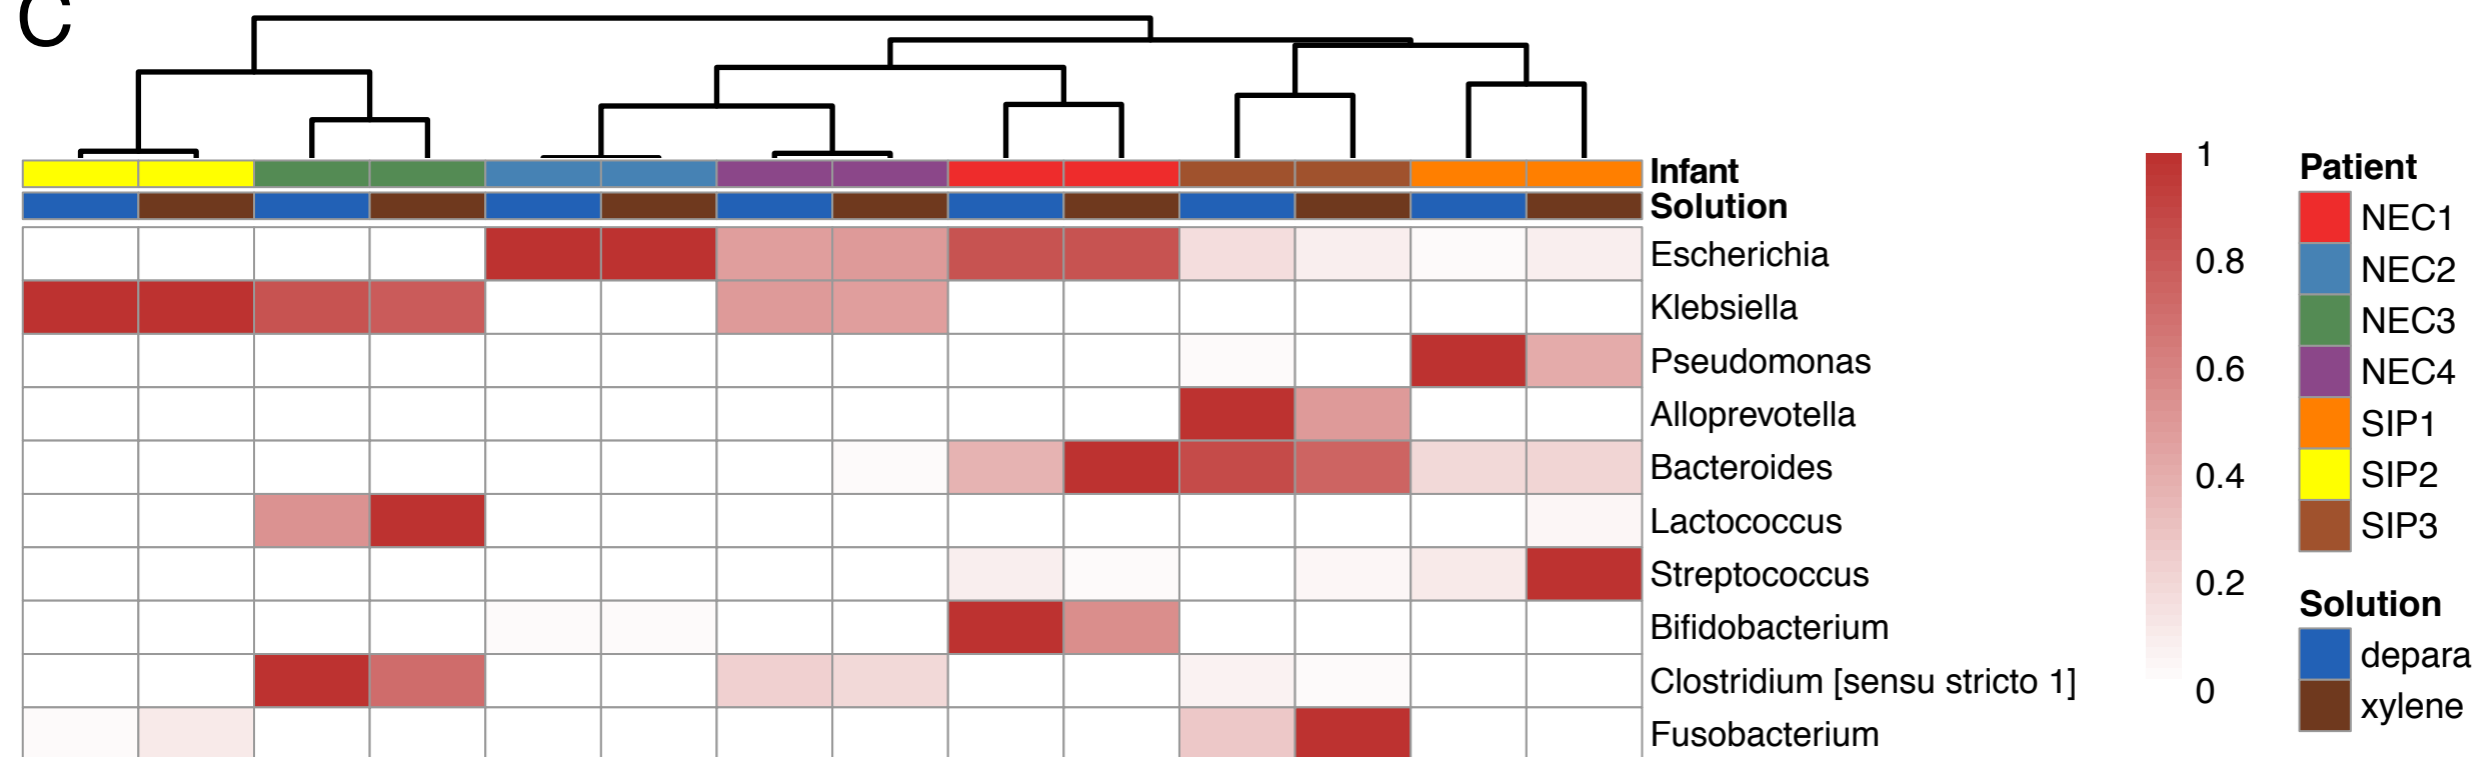

Supplement: 12866_2019_1426_MOESM1_ESM.pdf [file 12866_2019_1426_MOESM1_ESM.pdf]
