# Supplementary material for: Using formalin fixed paraffin embedded tissue to characterize the preterm gut microbiota in necrotising enterocolitis and spontaneous isolated perforation using marginal and diseased tissue
Source: PubMed Central journal article supplement (PMC6398254; doi:10.1186/s12866-019-1426-6), 2019-03-04
Supplement: 12866_2019_1426_MOESM2_ESM.pdf [file 12866_2019_1426_MOESM2_ESM.pdf]

Relative Abundance

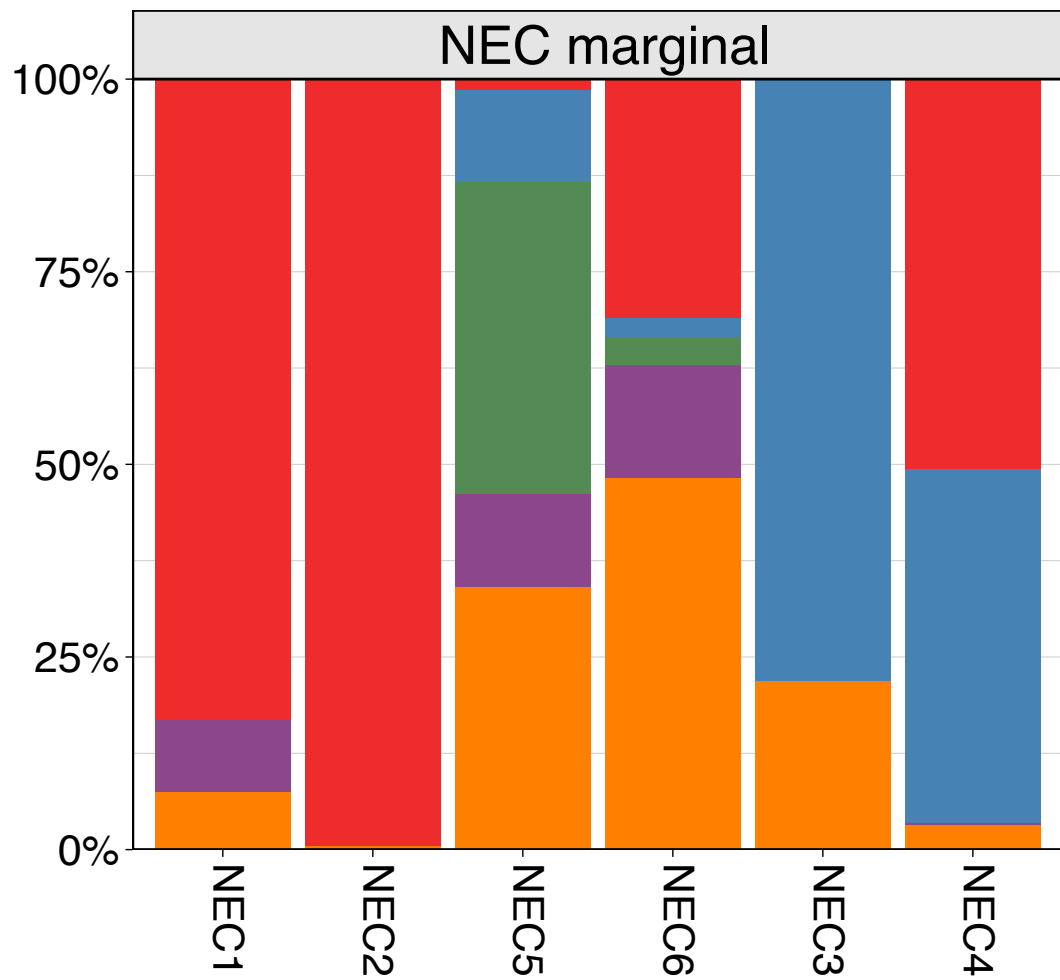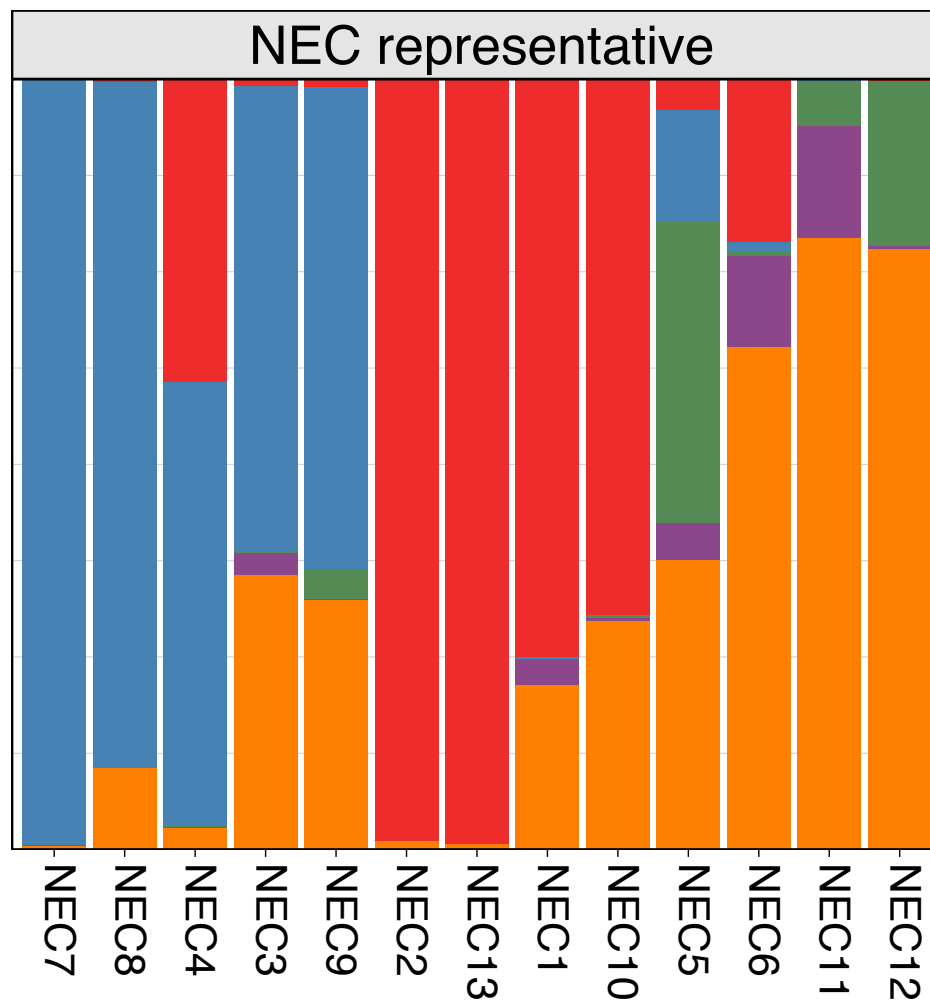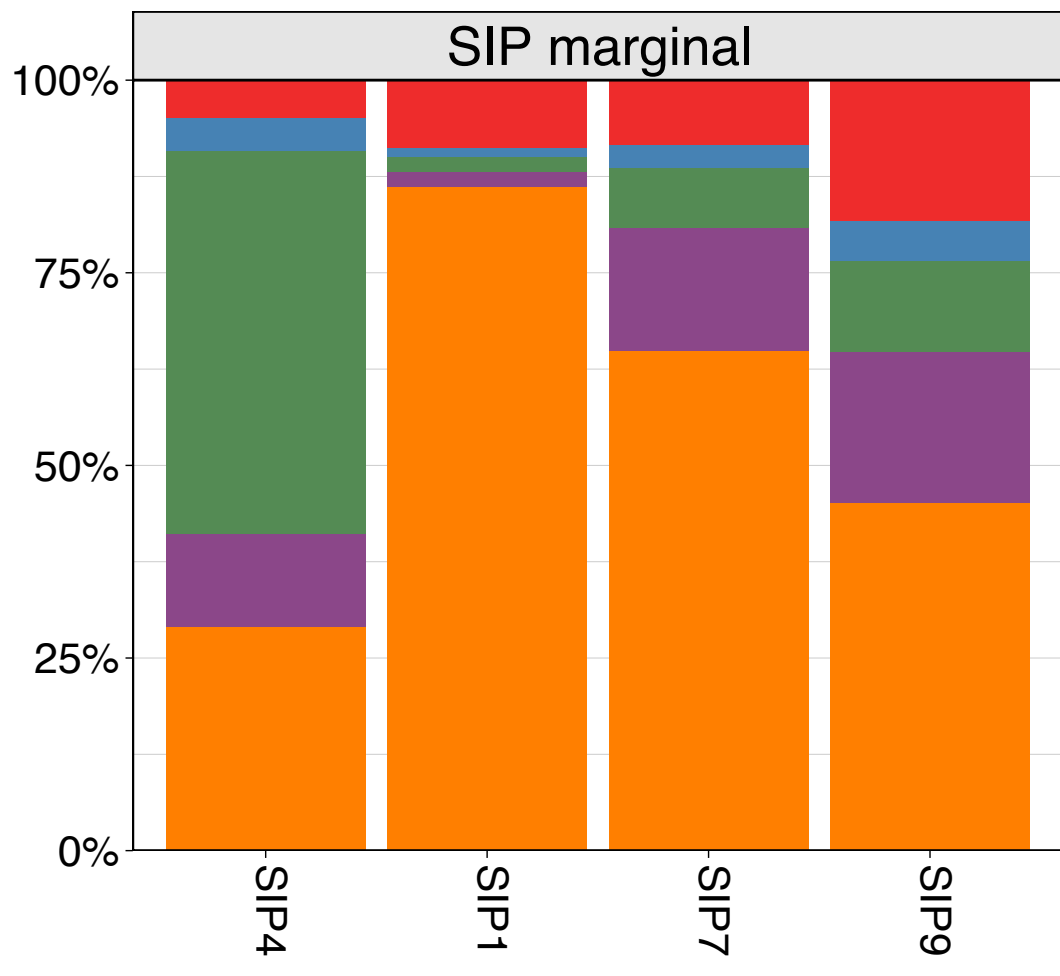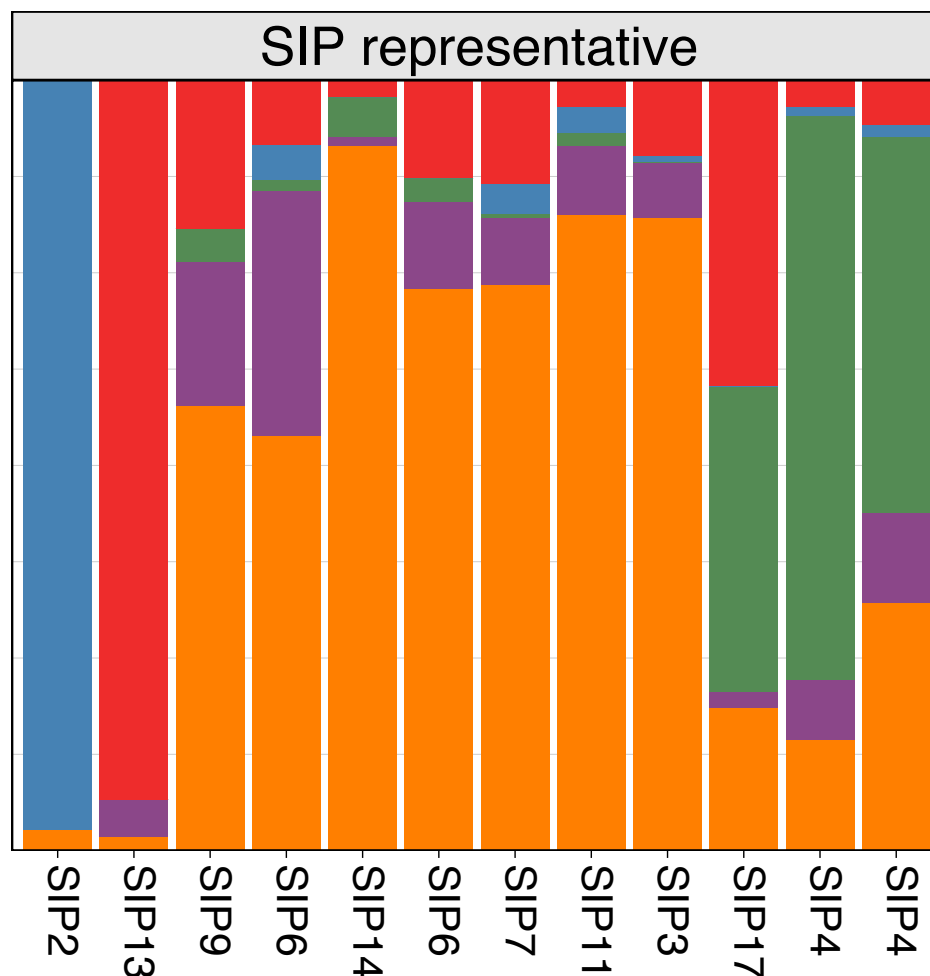

**Genus**

- Escherichia
- Klebsiella
- Staphylococcus
- Bacteroides
- Other
